# Supplementary material for: Overexpression of connexin 43 using a retroviral vector improves electrical coupling of skeletal myoblasts with cardiac myocytes in vitro
Source: PubMed Central journal article supplement (PMC1513252; doi:10.1186/1471-2261-6-25), 2006-06-06

A

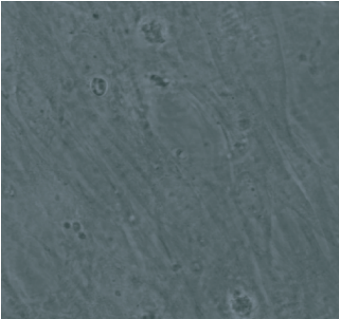

B

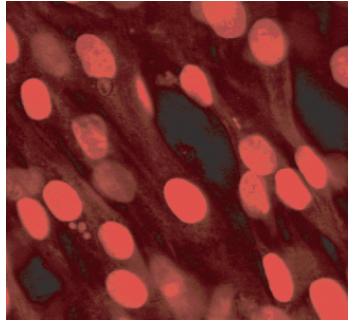

C

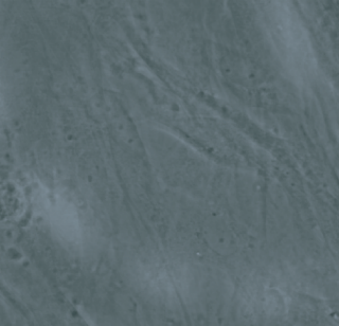

D

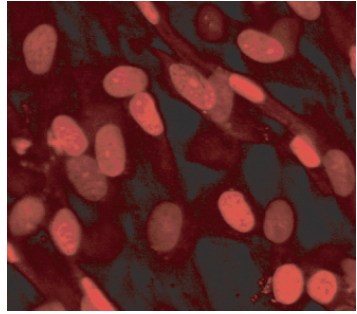

E

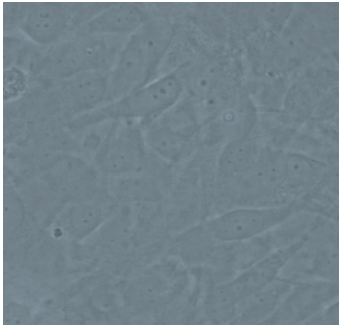

F

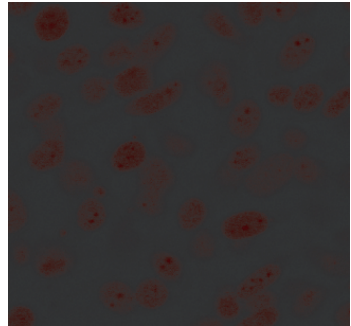

G

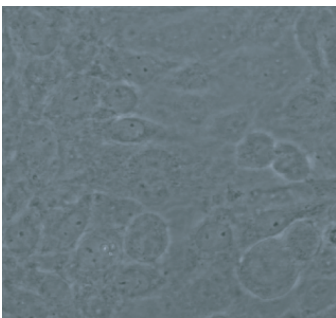

H

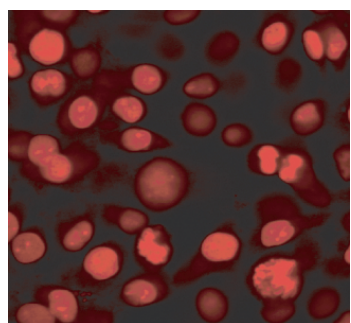

Supplement: 1471-2261-6-25-S2.pdf [file 1471-2261-6-25-S2.pdf]
